# Supplementary material for: Shifting UV-vis absorption spectrum through rational structural modifications of zinc porphyrin photoactive compounds
Source: Royal Society of Chemistry journal article supplement (doi:10.1039/c5ra25214h), 2016-01-01
Supplement: c5ra25214h1.pdf [file c5ra25214h1.pdf]

**Shifting UV-Vis spectrum through rational structural modifications of zinc porphyrin  
photoactive compounds**

Qudsia Arooj<sup>1</sup>, Gregory Wilson<sup>2</sup> and Feng Wang<sup>1\*</sup>

<sup>1</sup>Molecular model Discovery laboratory, Faculty of Science, Engineering and Technology, Department  
of Chemistry and Biotechnology, Swinburne University of Technology, Hawthorn, Melbourne,  
Victoria, 3122, Australia

<sup>2</sup>CSIRO Energy, Newcastle Energy Centre, 10 Murray Dwyer Cct Mayfield West, NSW, 2304 Australia

\*Corresponding author. Tel: +61 3 9214 5056; fax: +61-3-9214-5921

E-mail addresses: [fwang@swin.edu.au](mailto:fwang@swin.edu.au) (F.Wang)

**Table S1. Selected Calculated Bond Lengths (Å) for the Four Oxidation States of the Porphyrin macrocycles (in Chloroform)**

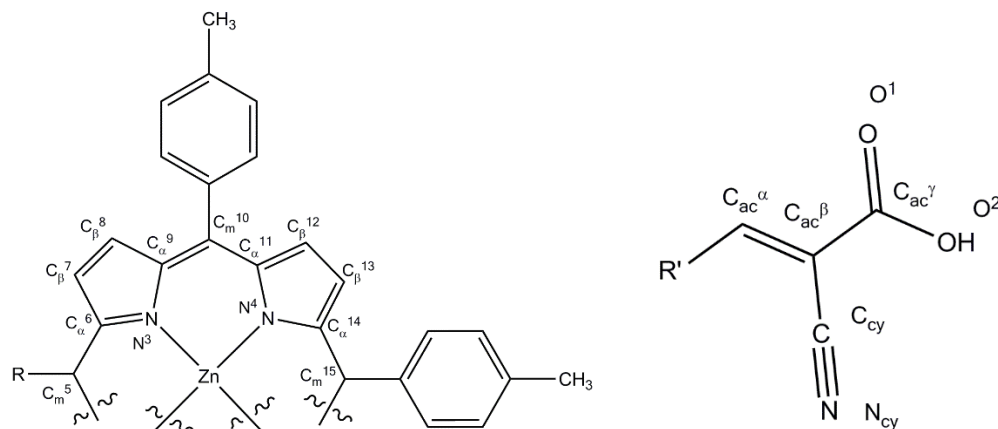

| Bond                                                       | Bond length (Å) |               |               |               |               |
|------------------------------------------------------------|-----------------|---------------|---------------|---------------|---------------|
|                                                            | Chloroform      |               |               |               |               |
|                                                            | Pzn-EDOT        | Zn-P- $\pi_1$ | Zn-P- $\pi_2$ | Zn-P- $\pi_3$ | Zn-P- $\pi_4$ |
| C <sub>R</sub> -C <sub>m</sub> <sup>5</sup>                | 1.495           | 1.493         | 1.492         | 1.481         | 1.481         |
| C <sub>m</sub> <sup>5</sup> -C <sub>α</sub> <sup>6</sup>   | 1.409           | 1.410         | 1.410         | 1.409         | 1.412         |
| C <sub>α</sub> <sup>6</sup> -C <sub>β</sub> <sup>7</sup>   | 1.446           | 1.447         | 1.448         | 1.446         | 1.446         |
| C <sub>β</sub> <sup>7</sup> -C <sub>β</sub> <sup>8</sup>   | 1.361           | 1.359         | 1.359         | 1.360         | 1.360         |
| C <sub>β</sub> <sup>8</sup> -C <sub>α</sub> <sup>9</sup>   | 1.445           | 1.446         | 1.446         | 1.446         | 1.445         |
| C <sub>α</sub> <sup>9</sup> -C <sub>m</sub> <sup>10</sup>  | 1.408           | 1.405         | 1.405         | 1.406         | 1.406         |
| C <sub>m</sub> <sup>10</sup> -C <sub>α</sub> <sup>11</sup> | 1.409           | 1.411         | 1.411         | 1.411         | 1.410         |
| C <sub>α</sub> <sup>11</sup> -C <sub>β</sub> <sup>12</sup> | 1.445           | 1.444         | 1.444         | 1.444         | 1.445         |
| C <sub>β</sub> <sup>12</sup> -C <sub>α</sub> <sup>13</sup> | 1.361           | 1.362         | 1.362         | 1.362         | 1.362         |
| C <sub>β</sub> <sup>13</sup> -C <sub>α</sub> <sup>14</sup> | 1.445           | 1.444         | 1.444         | 1.444         | 1.445         |
| C <sub>α</sub> <sup>14</sup> -C <sub>m</sub> <sup>15</sup> | 1.409           | 1.409         | 1.408         | 1.409         | 1.408         |
| C <sub>α</sub> <sup>6</sup> -N <sup>3</sup>                | 1.376           | 1.374         | 1.374         | 1.374         | 1.374         |
| C <sub>α</sub> <sup>9</sup> -N <sup>3</sup>                | 1.378           | 1.380         | 1.380         | 1.379         | 1.379         |
| C <sub>α</sub> <sup>11</sup> -N <sup>4</sup>               | 1.377           | 1.375         | 1.375         | 1.376         | 1.376         |
| C <sub>α</sub> <sup>14</sup> -N <sup>4</sup>               | 1.377           | 1.378         | 1.378         | 1.377         | 1.378         |
| N <sup>3</sup> -Zn                                         | 2.051           | 2.050         | 2.051         | 2.050         | 2.052         |
| N <sup>4</sup> -Zn                                         | 2.049           | 2.051         | 2.051         | 2.047         | 2.050         |
| C <sub>R</sub> -C <sub>ac</sub> <sup>α</sup>               | 1.419           | 1.422         | 1.428         | 1.440         | 1.443         |
| C <sub>ac</sub> <sup>α</sup> -C <sub>ac</sub> <sup>β</sup> | 1.376           | 1.373         | 1.370         | 1.365         | 1.493         |
| C <sub>ac</sub> <sup>β</sup> -C <sub>ac</sub> <sup>γ</sup> | 1.487           | 1.490         | 1.487         | 1.491         | 1.426         |
| C <sub>ac</sub> <sup>β</sup> -C <sub>Cy</sub>              | 1.424           | 1.425         | 1.424         | 1.426         | 1.648         |
| C <sub>Cy</sub> -N <sub>Cy</sub>                           | 1.165           | 1.165         | 1.165         | 1.165         | 1.215         |
| C <sub>ac</sub> <sup>γ</sup> -O <sup>1</sup>               | 1.219           | 1.218         | 1.216         | 1.216         | 1.346         |
| C <sub>ac</sub> <sup>γ</sup> -O <sup>2</sup>               | 1.351           | 1.350         | 1.348         | 1.348         |               |

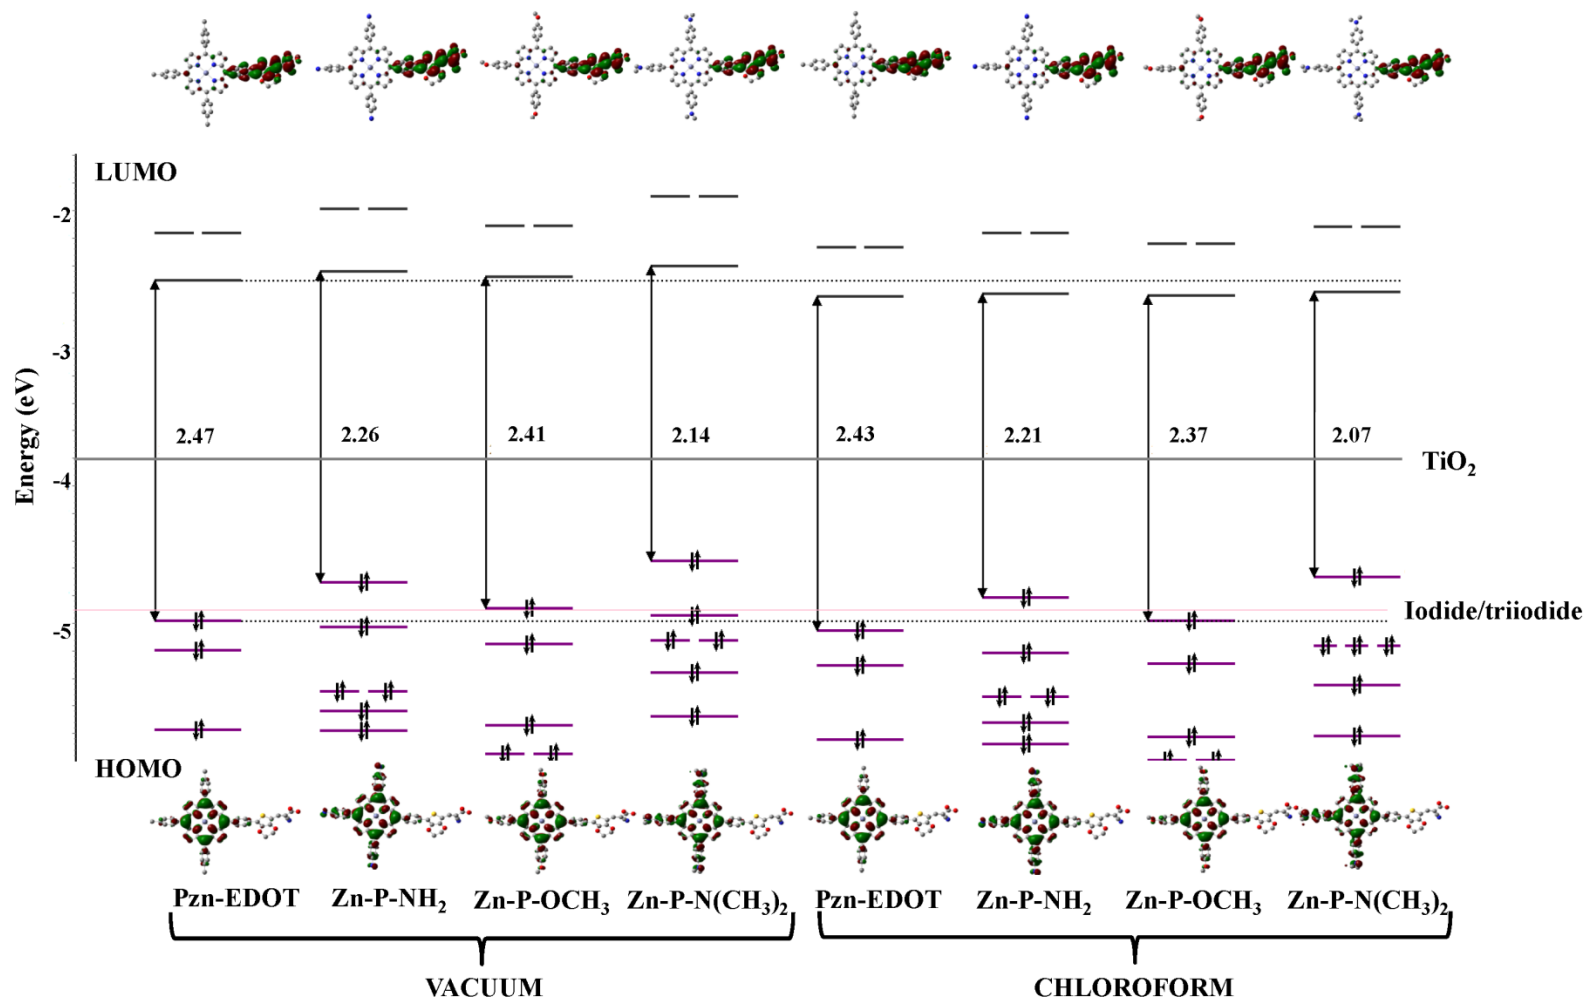

**Figure S2.** Single point calculated frontier MO (Molecular orbitals) using B3LYP/6-31G\* model in vacuum and Chloroform along with the comparison of charge density of HOMOs and LUMOs with the reference dye Pzn-EDOT and *meso*-substituted zinc porphyrin dyes.

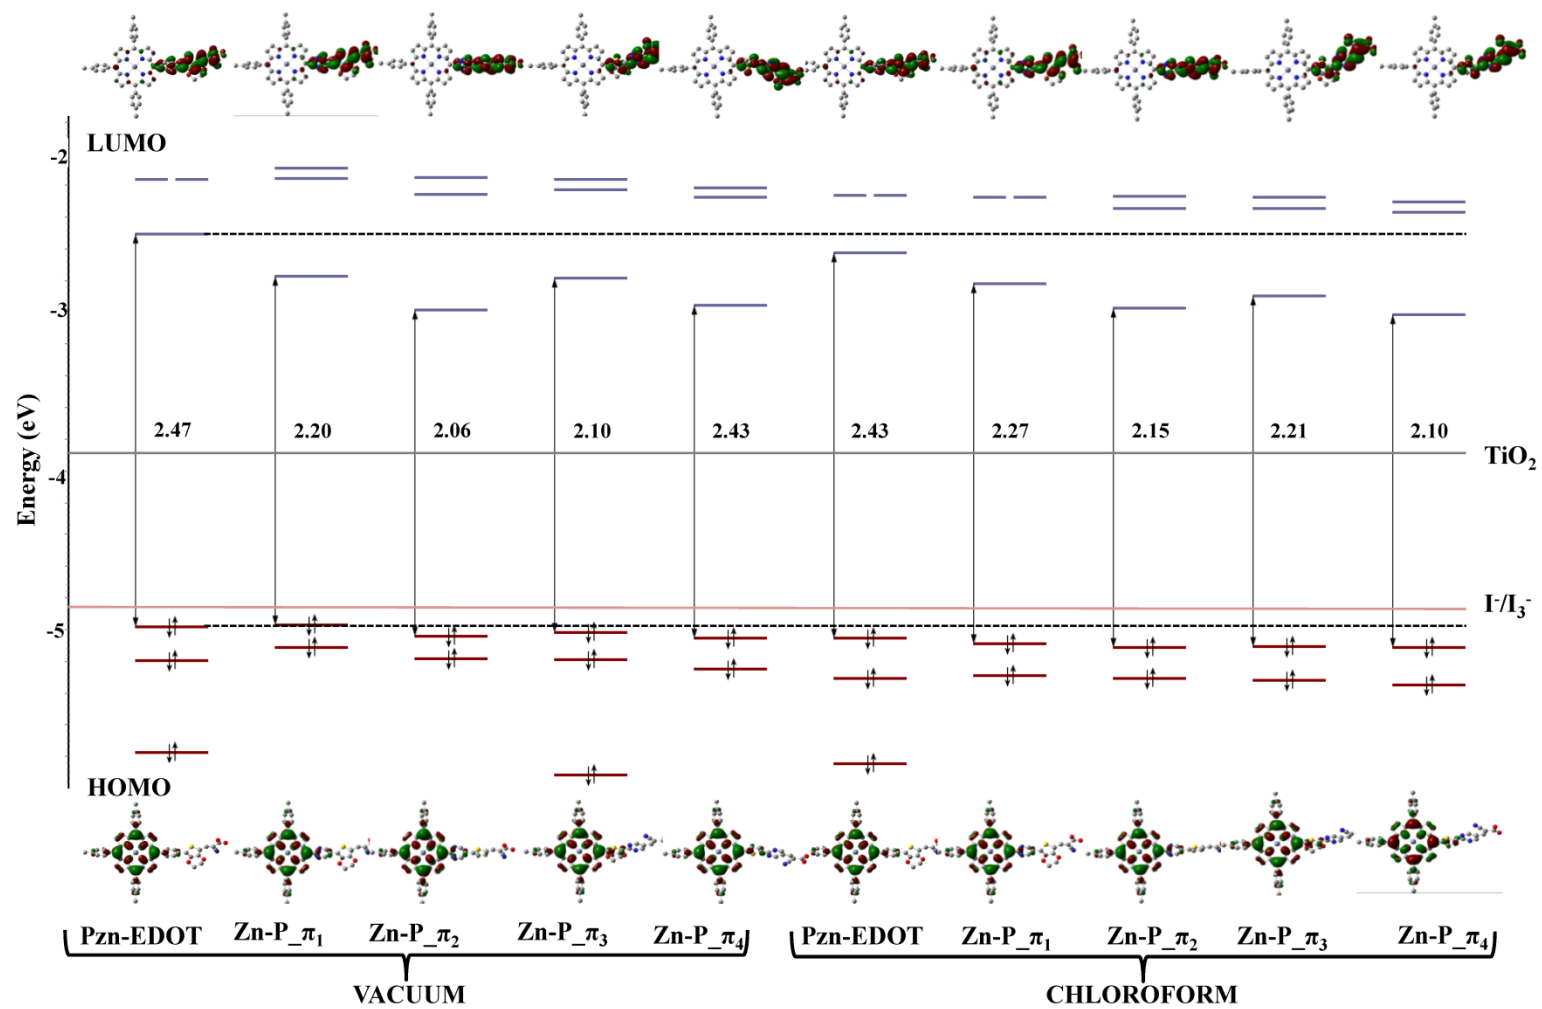

**Fig. S3** Single point calculated frontier MO (Molecular orbitals) using B3LYP/6-31G\* model in vacuum and Chloroform along with the comparison of charge density of HOMOs and LUMOs with the reference dye Pzn-EDOT and  $\pi$ -substituted zinc porphyrin dyes.

CHCl<sub>3</sub>

Vacuum

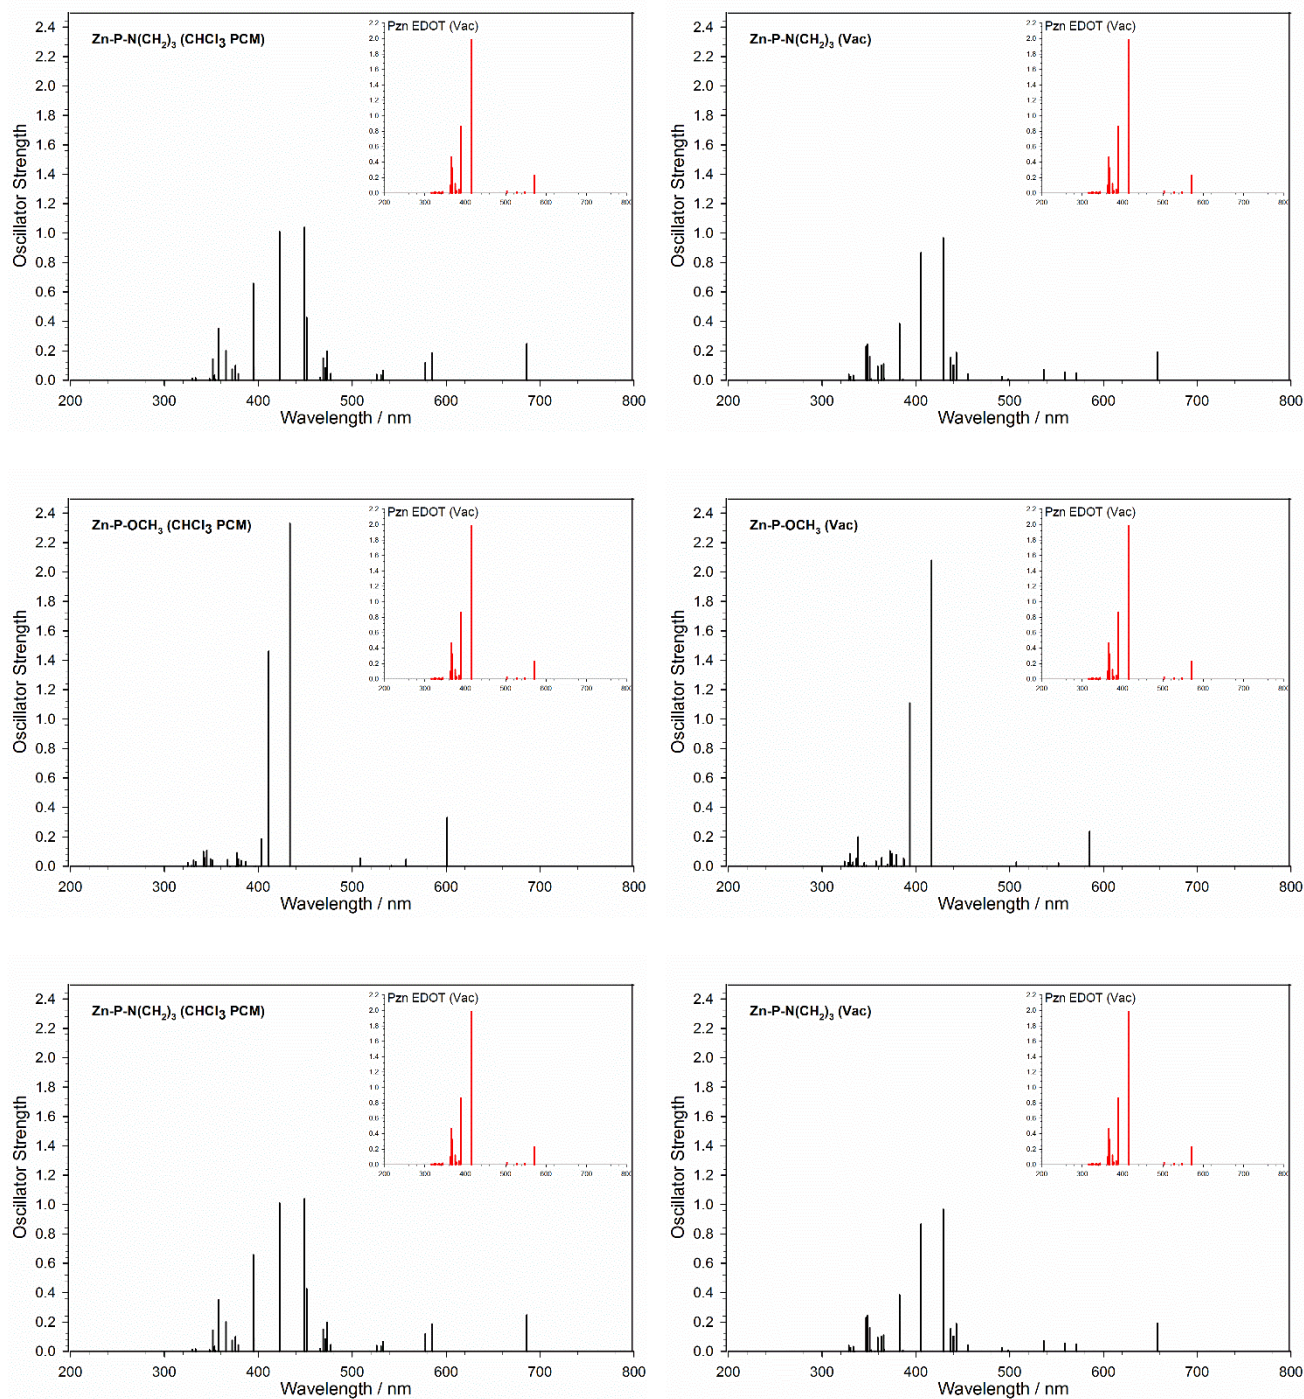

**Fig. S4.** Calculated excitations of three examples of meso-substituted porphyrins (black vertical lines) in polarised continuum and vacuum. The y axes for are scaled to the maximum oscillator strength for the examples studied. Inset: calculated excitations for the parent EDOT porphyrin (red vertical lines).



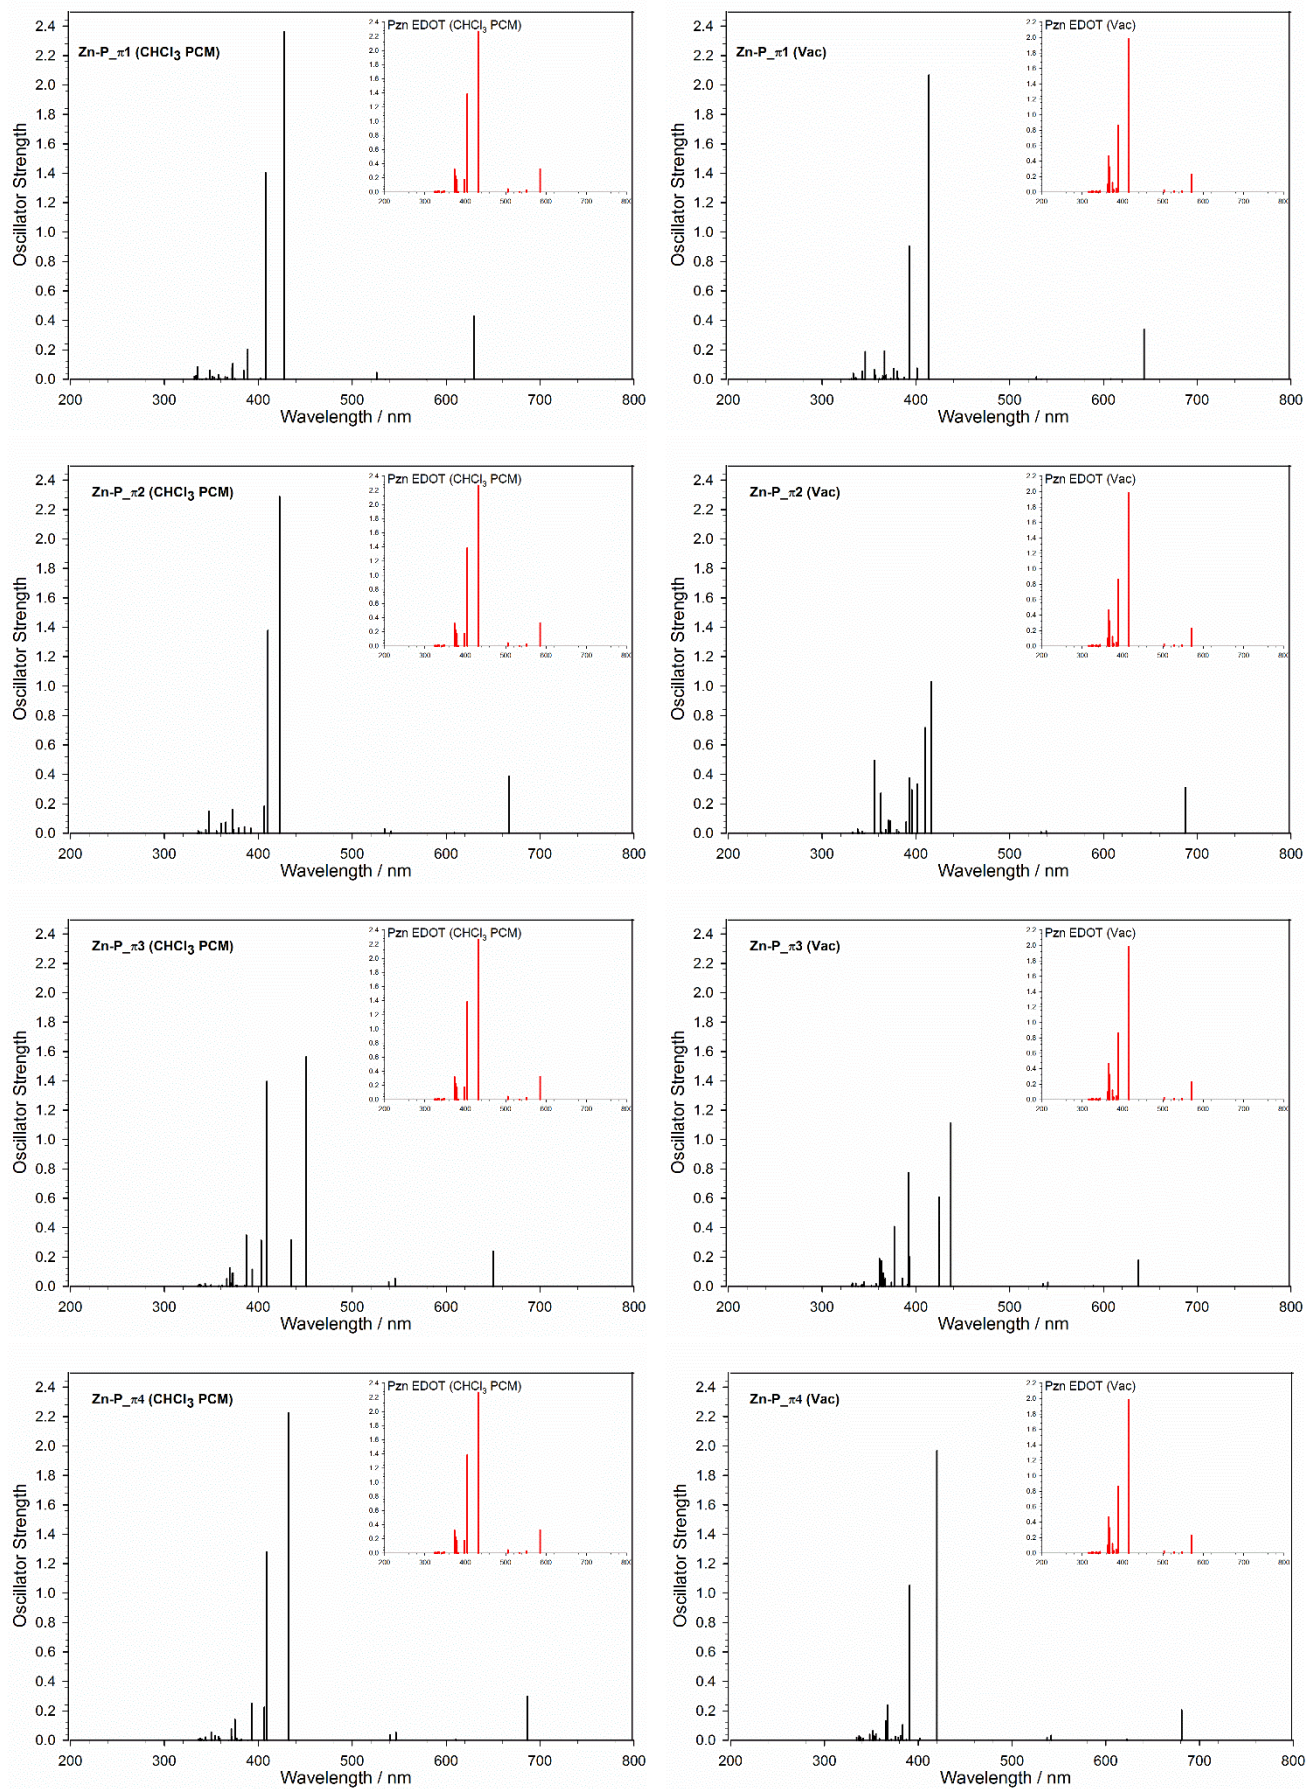

**Fig. S5.** Calculated excitations of four examples of Pi Bridge porphyrins (black vertical lines) in polarised continuum and vacuum. The y axes for are scaled to the maximum oscillator strength for the examples studied. Inset: calculated excitations for the parent EDOT porphyrin (red vertical lines).
